# Supplementary material for: Using Deep Convolutional Neural Networks for Enhanced Ultrasonographic Image Diagnosis of Differentiated Thyroid Cancer
Source: MDPI journal article supplement (doi:10.3390/biomedicines9121771), 2021-11-26
Supplement: s1 [file s1]

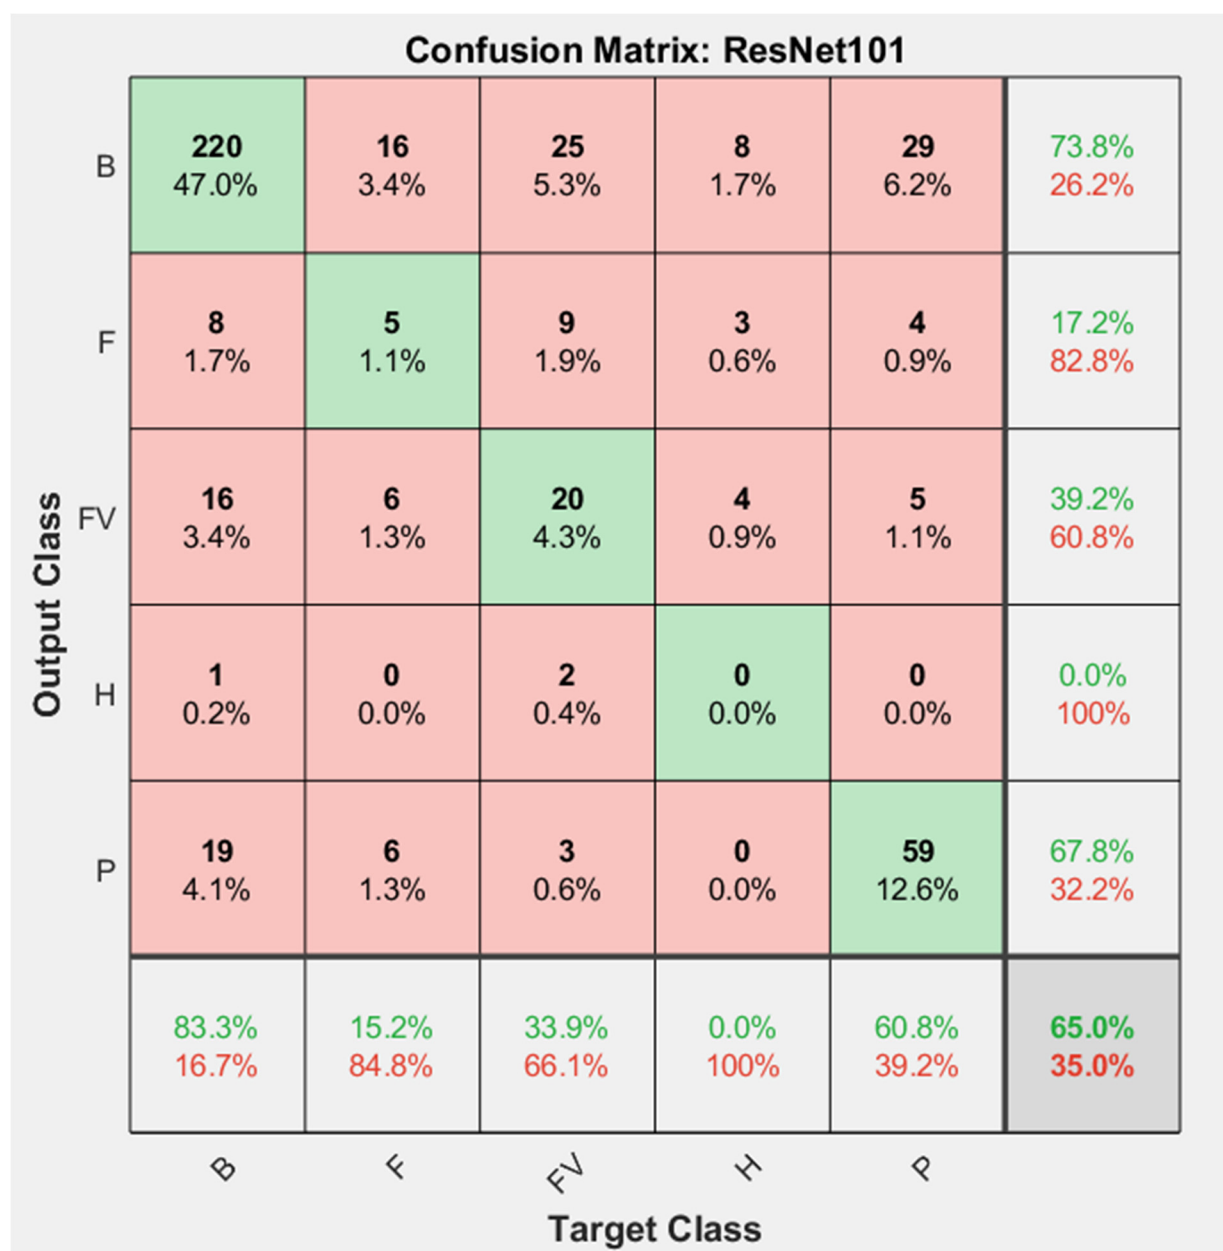

**Figure S1.** Confusion matrix of multi-class classification using ResNet101 in test set. B: Benign, F: Follicular thyroid carcinoma, FV: Follicular variant of papillary thyroid carcinoma, H: Hürthle cell carcinoma, P: Papillary thyroid carcinoma.
